# Supplementary material for: De novo phosphorylation of H2AX by WSTF regulates transcription-coupled homologous recombination repair
Source: PubMed Central journal article supplement (PMC6614800; doi:10.1093/nar/gkz309), 2019-05-02
Supplement: gkz309_supplemental_file.pdf [file gkz309_supplemental_file.pdf]

Supplementary Figure 1. Related to Figure 1.

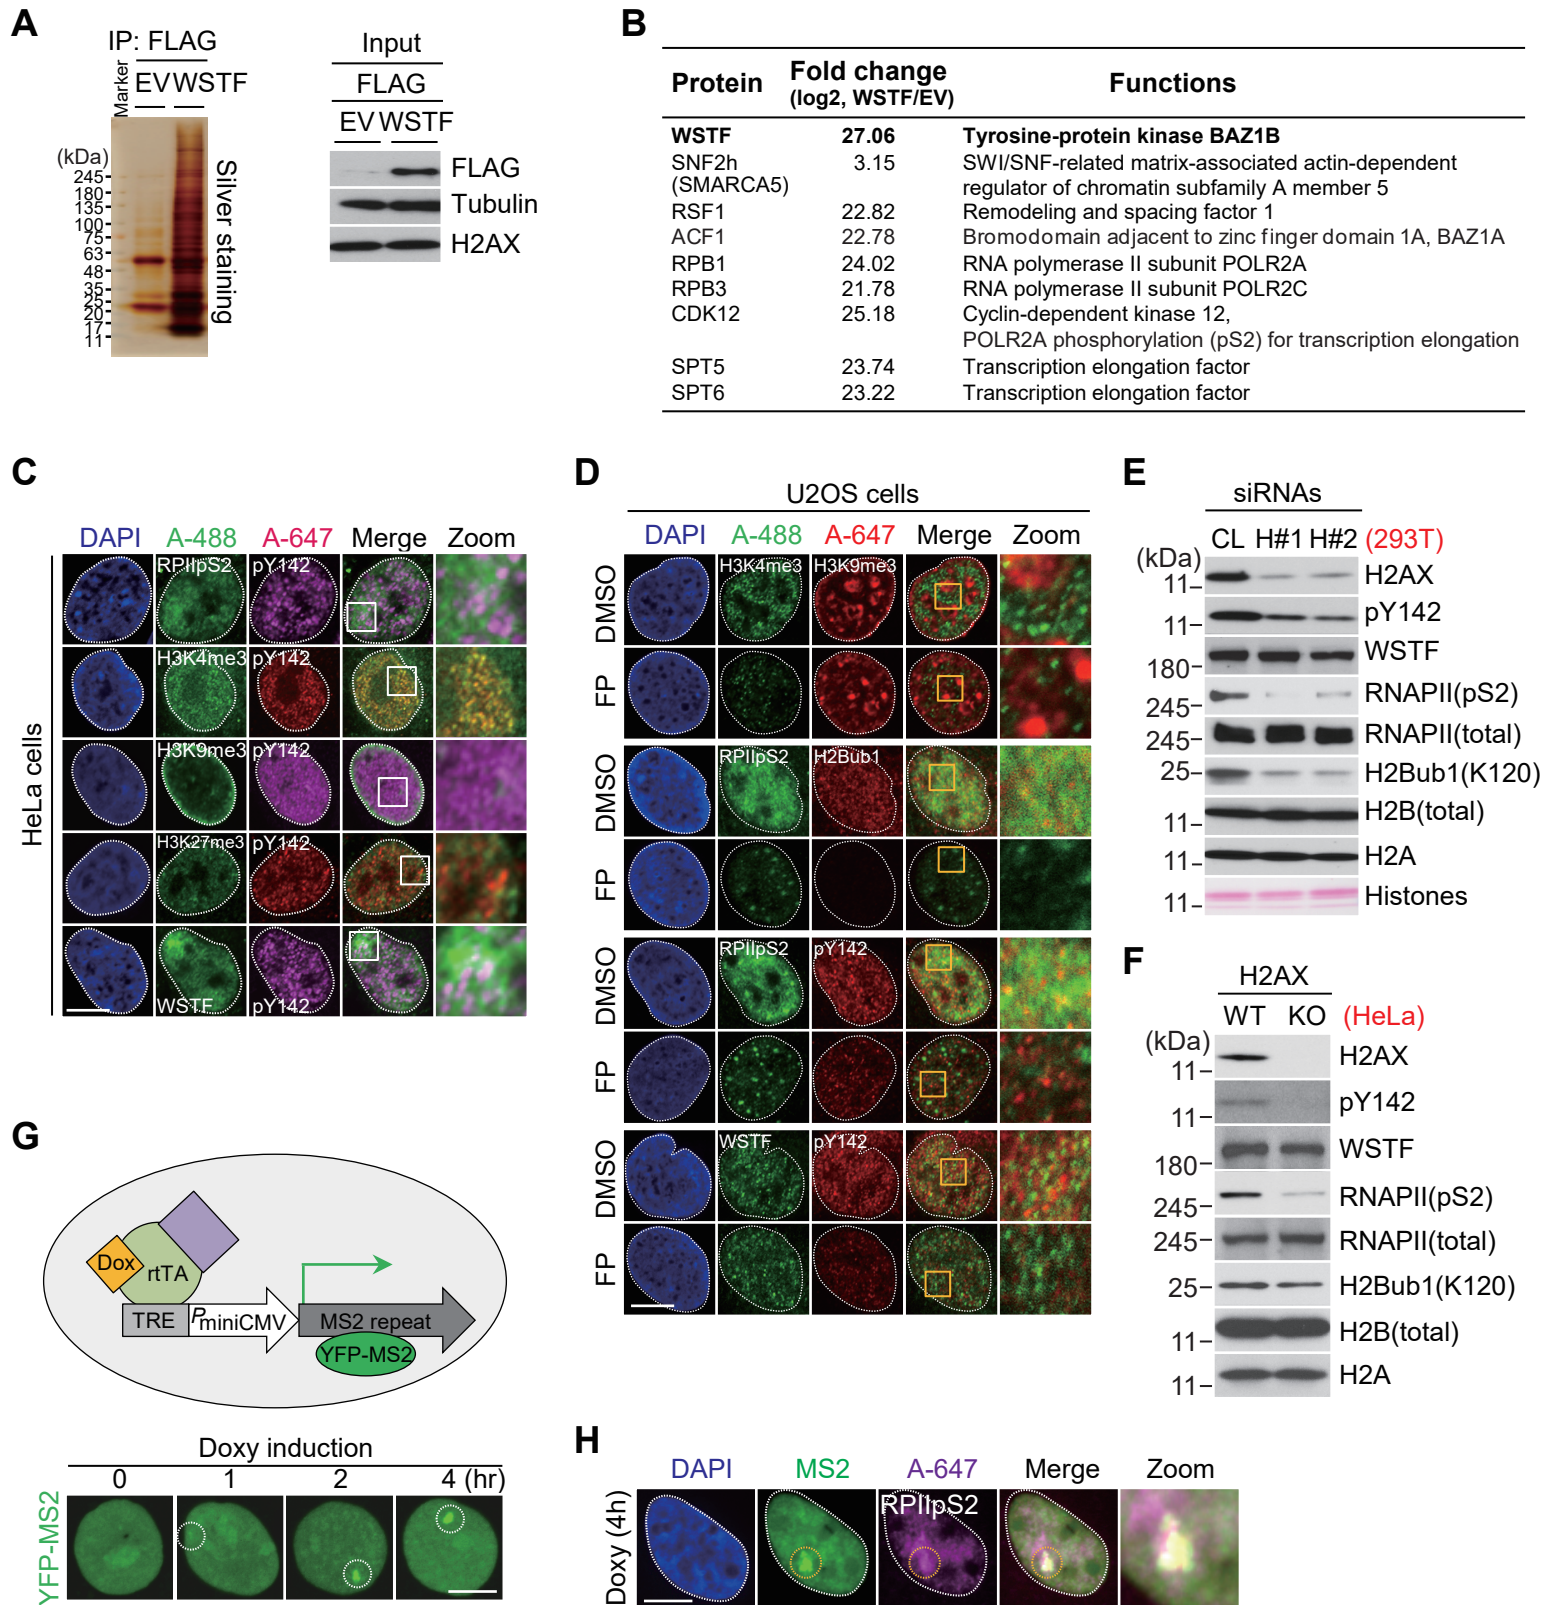

**Supplementary Fig. 1. Related to Fig. 1.** (A) To apply for mass spectrometry, 293T cells were transfected with ectopically expressed FLAG-WSTF or empty vector (EV). At 48 hr post-transfection, cell lysates were immunoprecipitated with anti-FLAG agarose. Immunoprecipitated FLAG-WSTF and its interacting proteins were confirmed by silver staining (left panel). Expression levels of FLAG-WSTF, tubulin, and H2AX were estimated by Western blots (right panels). (B) WSTF interacting proteins representative by mass spectrometry analysis. (C) Subcellular localizations of H2AX-pY142 (pY142), active markers [RNA polymerase II (RPIIpS2) and H3K4me3], inactive markers (H3K9me3 and H3K27me3) and WSTF in proliferating HeLa cells. Scale bars, 10  $\mu$ m. (D) U2OS cells were treated with RNA polymerase II inhibitor flavopiridol (FP) or DMSO for 4 hr, and then cells were immunostained with indicated antibodies. Scale bars, 10  $\mu$ m. (E and F) 293T cells were transfected with control siRNA (CL) or H2AX siRNAs (#1 or #2) for 48 hr (E), and then chromatin fractions isolated from E or H2AX wild type (WT) and knock-out (KO) HeLa cells (F) were western-blotted with indicated antibodies. (G) Local transcription visualizing system in single live cell. Live cells show accumulation of viral coat protein (YFP-MS2) within the reporter transcript by doxycycline (Doxy) induction in time-dependent manner. Scale bars, 10  $\mu$ m. (H) Evaluation of active RNA polymerase II (RPIIpS2) enrichments at local transcription site after doxycycline induction (Doxy) for 4 hr. Scale bars, 10  $\mu$ m.

**A** Inducible transcription system at break site

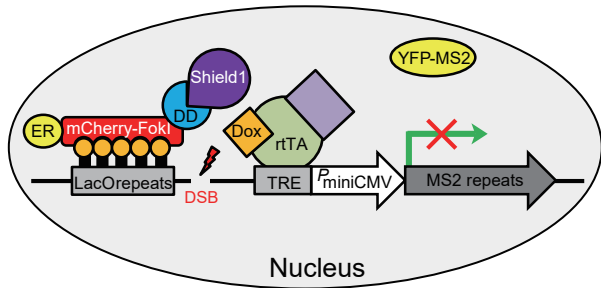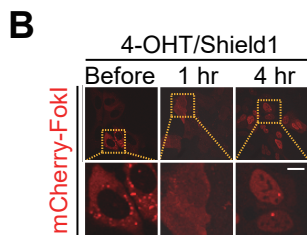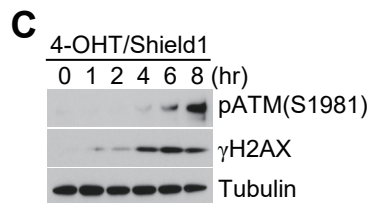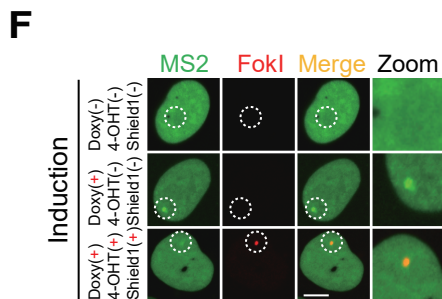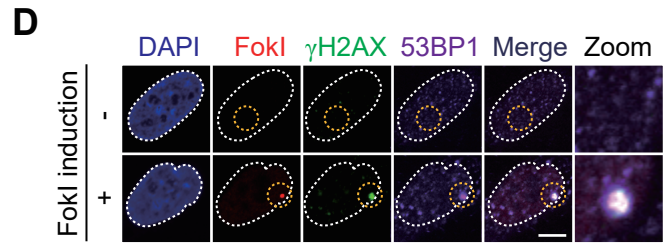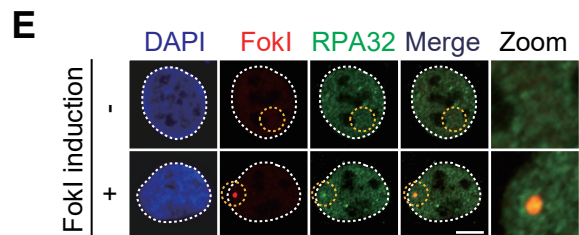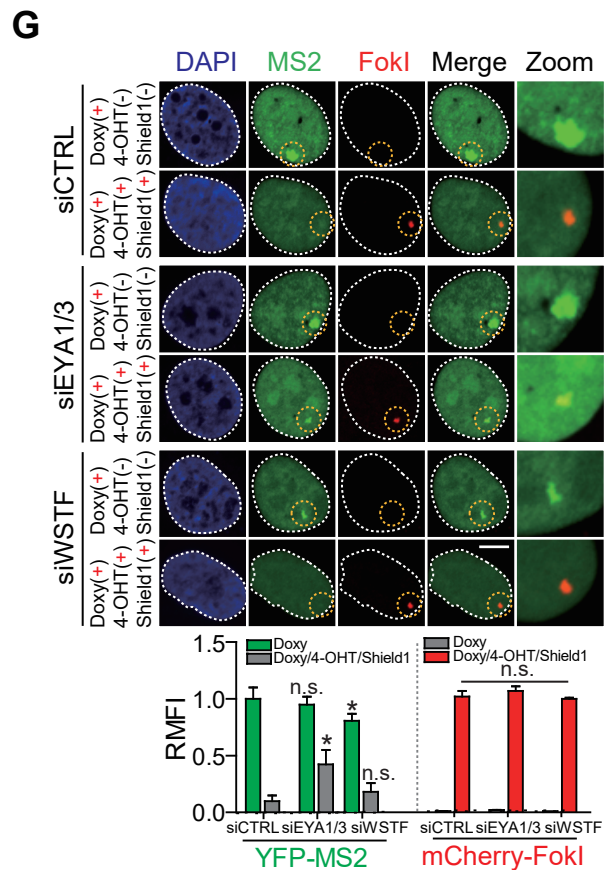

**Supplementary Fig. 2. Related to Fig. 3.** (A) A locally inducible DSB-mediated transcription system. Briefly, an accumulation of viral coat protein (YFP-MS2) within the reporter transcript near to Lac operator (LacO) is visualized by doxycycline (Doxy) induction. A stably expressed estrogen receptor (ER) fused mCherry-LacI-FokI-DD is translocated into chromosome1p3.6 locus integrated with LacO (x256 repeats) by induction of 4-OHT and Shield1 ligand, whereby mCherry-LacI-FokI makes DNA double-strand breaks (DSBs) by interacting with LacO. DD, degradation domain. (B and C) Evaluation of locally inducible DSB-mediated transcription system. The reporter cells were treated with 4-OHT and Shield1 in different time points. Expression of mCherry-LacI-FokI and its translocation to DSB sites were visualized with confocal microscope (Nikon A1) (B), and activation of DNA damage signaling factors, pATM and γH2AX, was detected by Western blots (C). Scale bars, 10 μm. (D and E) The recruitments of DNA damage repair factors 53BP1 and RPA32 were detected with anti-53BP1 (D) and anti-RPA32 (E) antibodies by FokI induction. An anti-γH2AX antibody was used for detecting DNA damage sites. Scale bars, 10 μm. (F) An accumulation of YFP-MS2 (MS2) and mCherry-LacI-FokI (FokI) at DSB sites by induction of doxycycline (Doxy) and/or 4-OHT and Shield1. Scale bars, 10 μm. (G) The reporter cells were transfected with control, EYA1/EYA3, or WSTF siRNAs for 48 hr. An accumulation of YFP-MS2 (MS2) at DSB sites was induced by treatment with doxycycline (Doxy) for 4 hr. At the same time, DNA double strand breaks were occurred by FokI induction. Scale bars, 10 μm. Quantitative analysis for the fluorescence intensity of YFP-MS2 and FokI at DSB sites. The plotted values represent mean ± SEM of more than 50 individual cells. n.s. means not significant.

Supplementary Figure 3. Related to Figure 4.

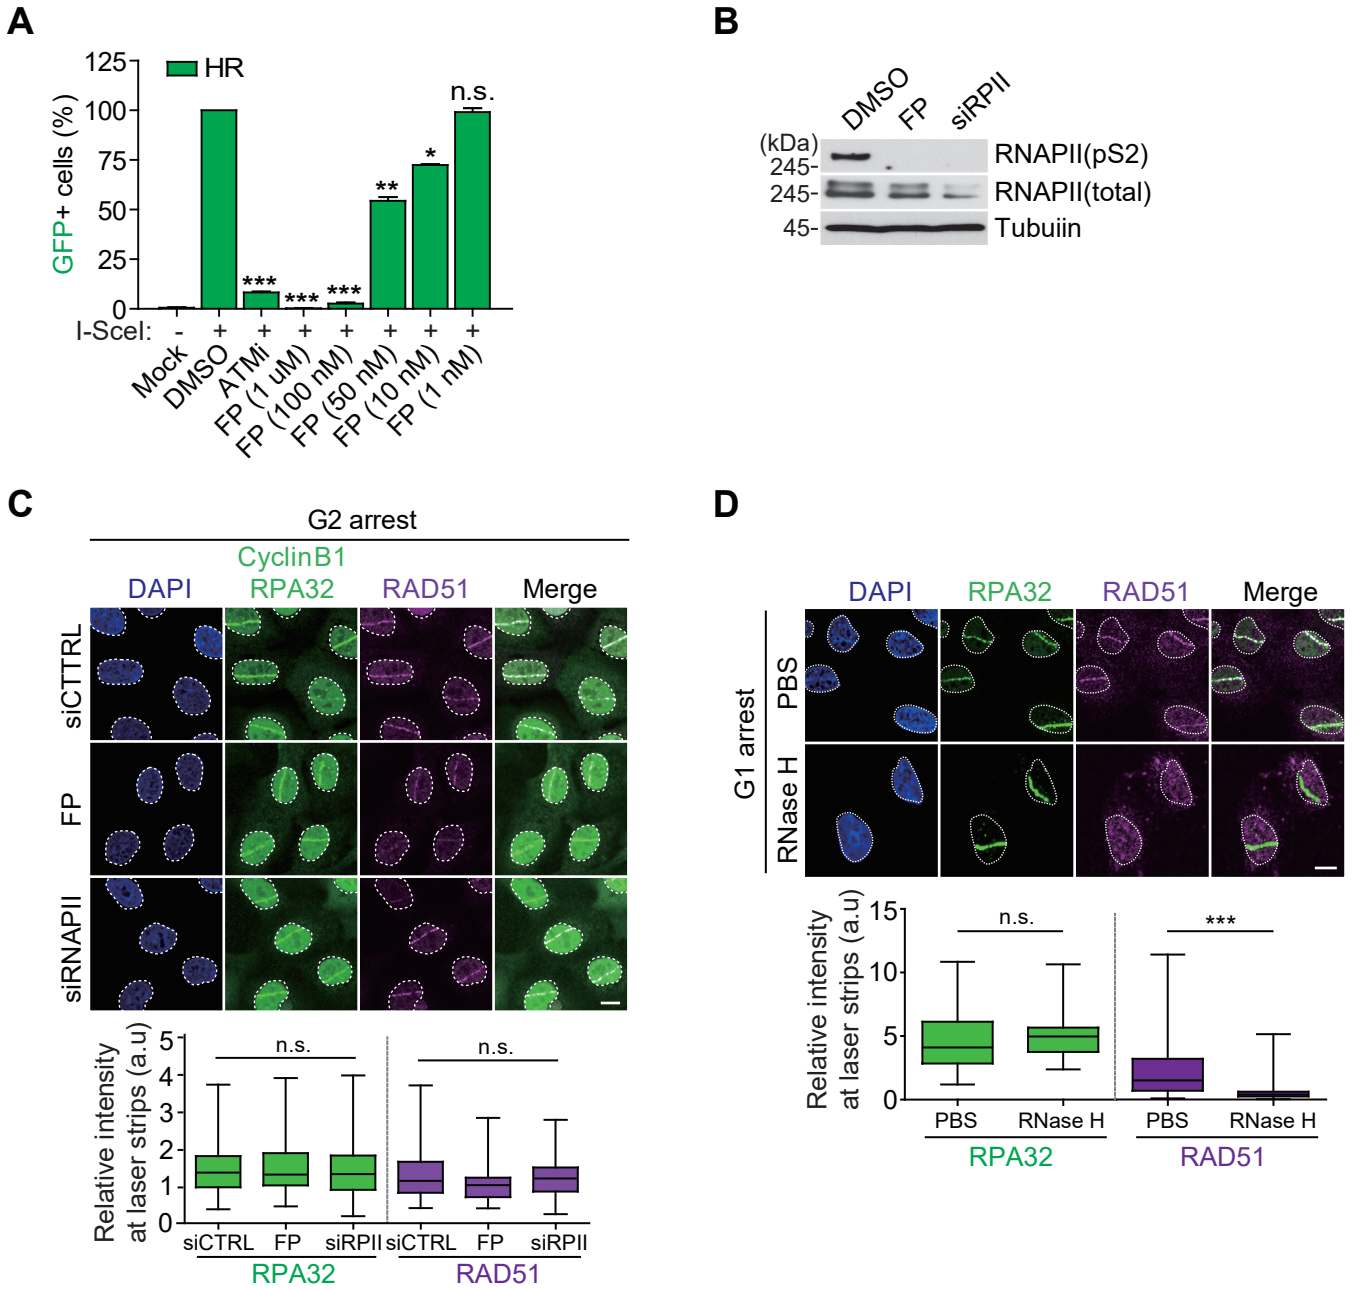

**Supplementary Fig. 3. Related to Fig. 4.** (A) Comparative analysis of HR repair into HR reporter cells. ATM inhibitor (ATMi) and different doses of flavopiridol (FP) were treated after transfection with I-SceI plasmid. Data represent mean  $\pm$  SEM of three independent experiments. n.s. means not significant. (B) Expression levels of RNAPII and RNAPIIpS2 by depletion or inhibition of RNAPII. (C) HeLa cells were transfected with control or RNAPII-targeting siRNA and released to arrest at G2 phase by double thymidine block. Flavopiridol (FP) was treated before 1 hr microirradiation. At 2 hr post-microirradiation, fixed cells were immunostained with indicated antibodies. An anti-Cyclin B1 antibody was used for G2-specific. Scale bars, 10  $\mu$ m. Data represent mean  $\pm$  SEM of more than 20 cells. n.s. means not significant. (D) G1-arrested HeLa cells were treated with RNase H for 10 min at 2 hr post-microirradiation. Then, fixed cells were immunostained with indicated antibodies. Scale bars, 10  $\mu$ m. Data represent mean  $\pm$  SEM of three independent experiments. n.s. means not significant.

Supplementary Figure 4. Related to Figure 5.

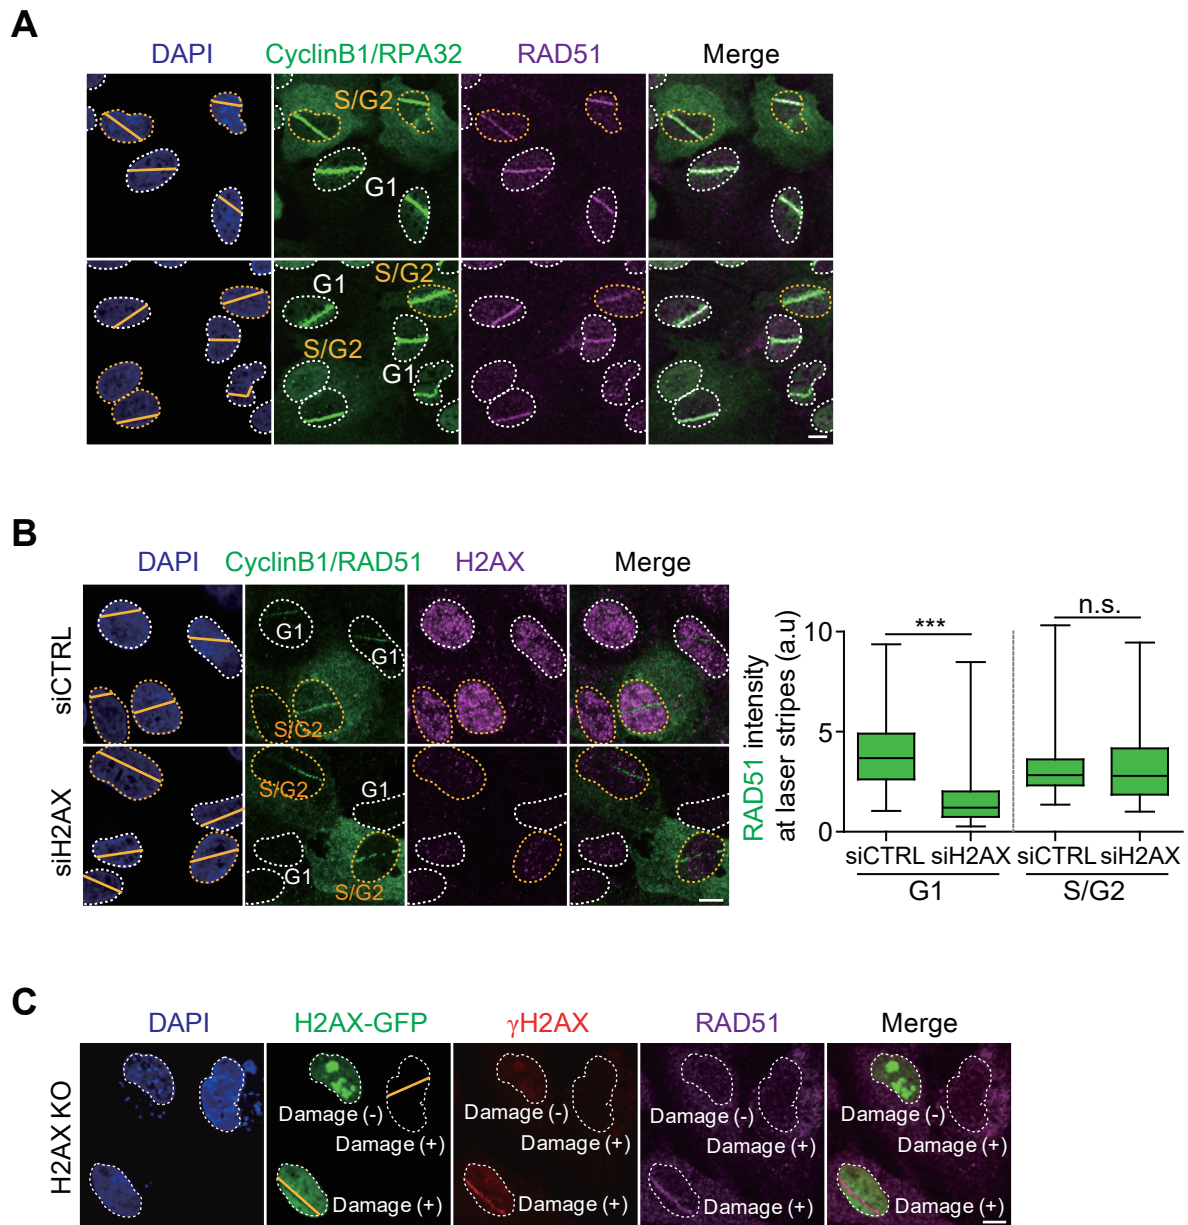

**Supplementary Fig. 4. Related to Fig. 5.** (A) U2OS cells were applied to microirradiation. Fixed cells were immunostained with anti-RPA32 and anti-RAD51 antibodies at 2 hr post-microirradiation. An anti-Cyclin B1 antibody was used for detecting S/G2 phasic cells. Scale bars, 10  $\mu$ m. (B) U2OS cells were transfected with control or H2AX-targeting siRNA. After 2 hr, microirradiated cells were fixed and immunostained with anti-RAD51 and anti-H2AX antibodies. An anti-Cyclin B1 antibody was used for S/G2-specific. Scale bars, 10  $\mu$ m. Data represent mean  $\pm$  SEM of three independent experiments. n.s. means not significant. (C) HeLa H2AX KO cells were transfected with H2AX-GFP wild type. At 48 hr post-transfection, cells were applied to microirradiation. Fixed cells were immunostained with anti- $\gamma$ H2AX and anti-RAD51 antibodies at 2 hr post-microirradiation. Scale bars, 10  $\mu$ m.

Supplementary Figure 5. Related to Figure 6.

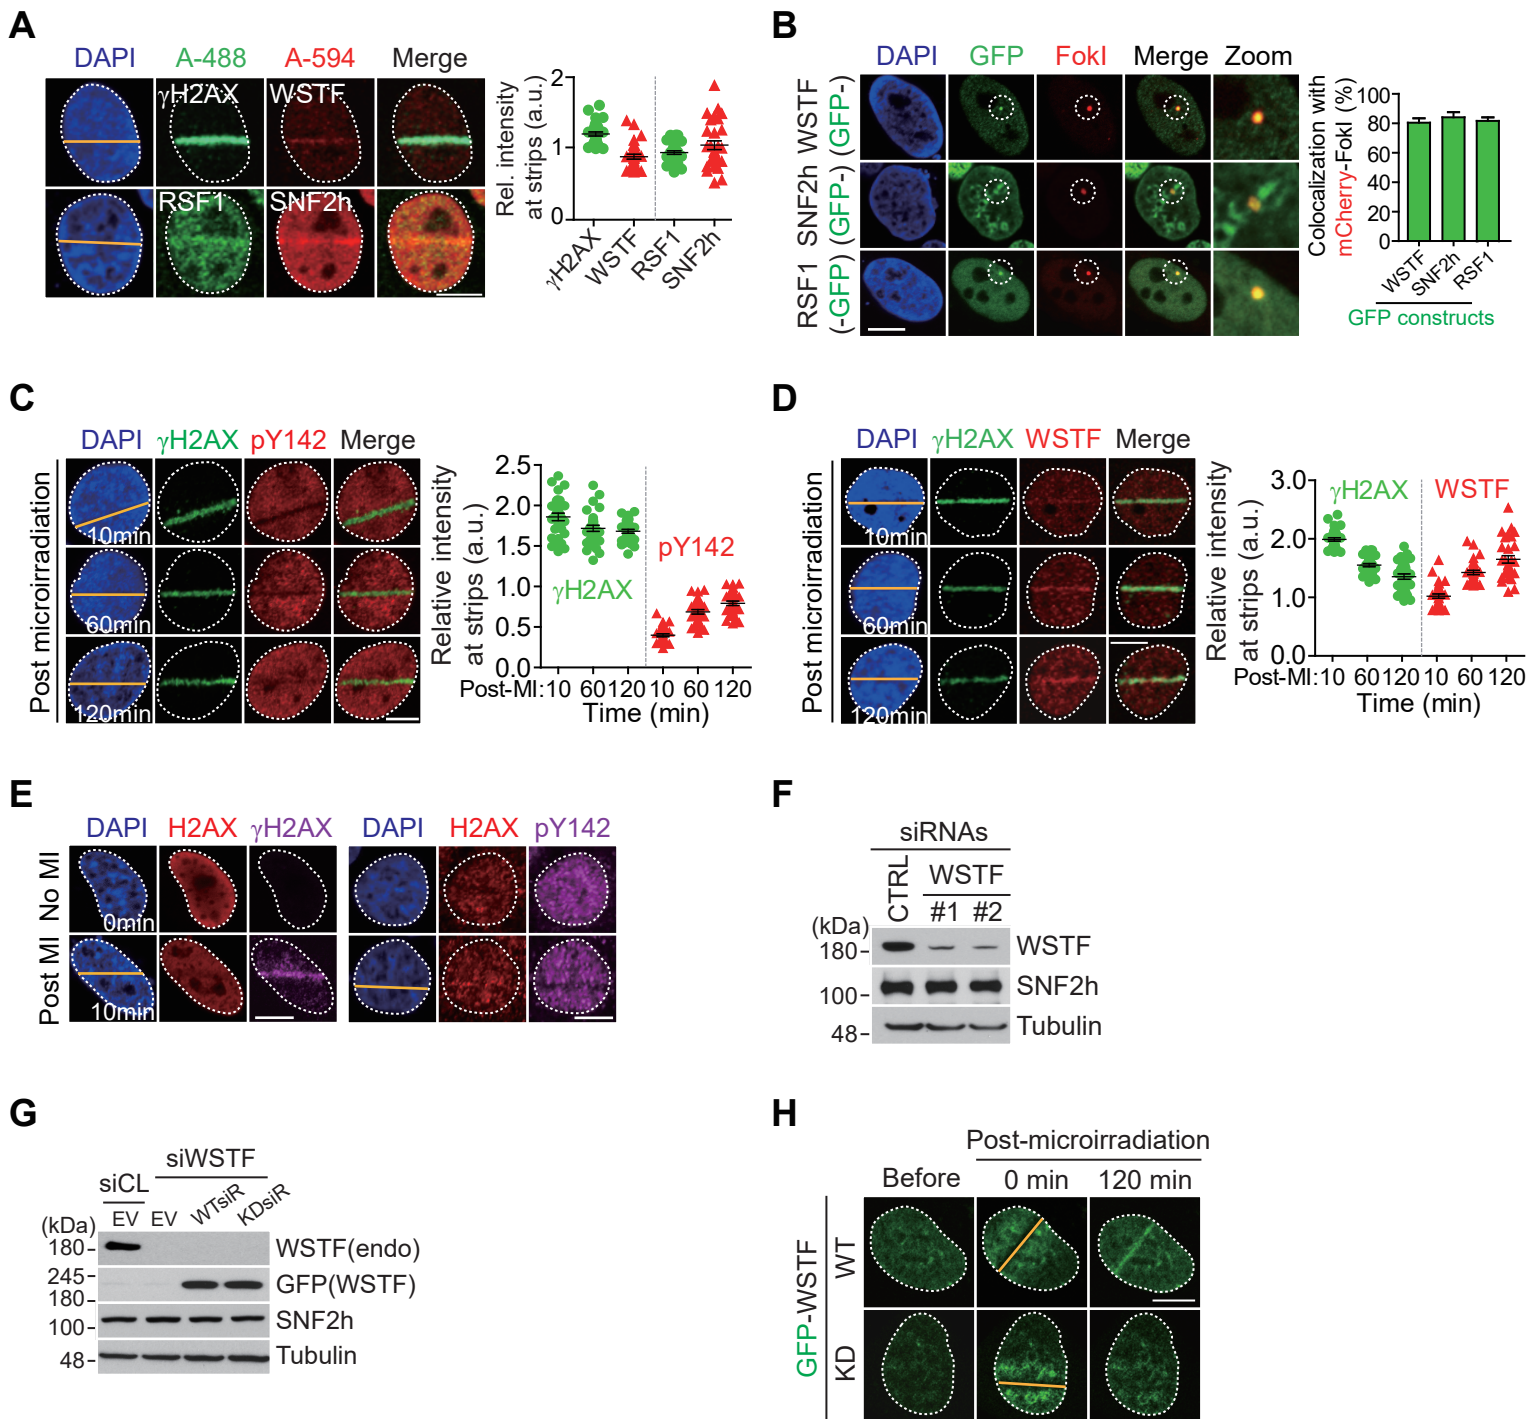

**Supplementary Fig. 5. Related to Fig. 6.** (A) U2OS cells were fixed and immuno-stained with anti- $\gamma$ H2AX and anti-WSTF or anti-RSF1 and anti-SNF2h antibodies at 10 min post-microirradiation. Scale bars, 10  $\mu$ m. Data represent mean  $\pm$  SEM of three independent experiments. (B) U2OS 2-6-3 cells were transfected with GFP-fused WSTF, SNF2h, and RSF1 in combination with mCherry-LacI-FokI plasmid for 48 hr. Cells were fixed and stained with 4',6-diamidino-2-phenylindole (DAPI) solution. The colocalization of GFP-fused proteins and FokI was detected by confocal microscope (Nikon A1). Scale bars, 10  $\mu$ m. Data represent mean  $\pm$  SEM of more than 50 cells. (C-E) U2OS cells were microirradiated and fixed at indicated time points. Fixed cells were immunostained with anti- $\gamma$ H2AX and anti-pY142 (C), anti- $\gamma$ H2AX and anti-WSTF (D), or anti-H2AX and anti- $\gamma$ H2AX or anti-pY142 (E) antibodies. Scale bars, 10  $\mu$ m. Data represent mean  $\pm$  SEM of three independent experiments. (F) Expression levels of endogenous WSTF by WSTF-targeting siRNAs (#1 and #2). (G) Expression levels of endogenous WSTF and ectopic WSTF resistant WSTF-targeting siRNA into U2OS cells. (H) The live cell images of accumulation of GFP-fused WSTF wild type (WT) and kinase-dead mutant (KD) at laser stripes in different time points (0 min and 120 min) in U2OS cells.

**Supplementary Table 1. List of antibodies used in this study.**

| <b>Antibody</b>           | <b>Company</b>            | <b>Clone, catalog no.</b> |
|---------------------------|---------------------------|---------------------------|
| WSTF                      | Fitzgerald                | 10R-1247                  |
| WSTF                      | Santa Cruz Biotechnology  | BAZ1H4H9, sc-81426        |
| WSTF                      | Sigma-Aldrich             | W3766                     |
| $\gamma$ H2AX             | Merk                      | JBW301, 05-636            |
| $\gamma$ H2AX             | GeneTex                   | GTX127340                 |
| H3K4me3                   | Abcam                     | ab1012                    |
| H3K9me3                   | Abcam                     | ab8898                    |
| H3K9me3                   | Active Motif              | 2AG-6F12-H4, 39286        |
| pY142                     | Abcam                     | ab94602                   |
| pY142                     | Merk                      | 07-1590                   |
| pY142                     | Thermo Fisher Scientific  | PA5-40153                 |
| RNA polymerase II (total) | BioLegend                 | 8WG16                     |
| RNA polymerase II (pS2)   | BioLegend                 | H5                        |
| H2Bub1 (K120)             | Cell Signaling Technology | D11, 5546                 |
| H2B (total)               | Cell Signaling Technology | D2H6, 12364               |
| H2AX                      | Cell Signaling Technology | D17A3, 7631               |
| H2AX                      | LSBio                     | 3F4, LS-C197392           |
| Tubulin                   | Santa Cruz Biotechnology  | B-5-1-2, sc-23948         |
| H3                        | Abcam                     | ab1791                    |
| FLAG                      | Sigma-Aldrich             | M2, F3165                 |
| H2A                       | Abcam                     | ab18255                   |
| H3K27me3                  | Abcam                     | ab6002                    |
| EYA1                      | Santa Cruz Biotechnology  | L-19, sc-15094            |
| EYA3                      | Abcam                     | ab22835                   |
| GFP                       | Santa Cruz Biotechnology  | B-2, sc-9996              |
| MDC1                      | Abcam                     | ab11169                   |
| RPA32                     | Abcam                     | 9H8, ab2175               |
| RAD51                     | Merk                      | Ab-1, PC130               |
| RAD51                     | GeneTex                   | N1C2, GTX100469           |
| RAD51                     | Novus                     | 14B4, NB100-148           |
| 53BP1                     | Cell Signaling Technology | 4937                      |
| SNF2h                     | Merk                      | 8F9.1, MABE120            |
| pATM(S1981)               | Abcam                     | ab36810                   |
| Cyclin E                  | Santa Cruz Biotechnology  | M-20, sc-481              |
| Cyclin B1                 | Santa Cruz Biotechnology  | GNS1, sc-245              |
| CtlP                      | Santa Cruz Biotechnology  | D-4, sc-271339            |

**Supplementary Table 2. List of siRNAs used in this study.**

| <b>Gene</b> | <b>siRNA Sequences</b>          | <b>Targeting region</b> | <b>Supplier<br/>(<a href="http://www.genolution1.com">http://www.genolution1.com</a>)</b> |
|-------------|---------------------------------|-------------------------|-------------------------------------------------------------------------------------------|
| WSTF (#1)   | 5'-GAACAGGAAGUUGCUGAGC-3'       | CDS                     | Genolution                                                                                |
| WSTF (#2)   | 5'-GAUAGUUCGAUACUUUAUAUU-3'     | CDS                     | Genolution                                                                                |
| H2AX (#1)   | 5'-CACCCAGGCCUCCCAGGAGUACUAA-3' | CDS                     | Genolution                                                                                |
| H2AX (#2)   | 5'-GGGACGAAGCACUUGGUAA-3'       | 3' UTR                  | Genolution                                                                                |
| H2AX (#3)   | 5'-GGAAAGAGCUGAGCCGCUUUU-3'     | 3' UTR                  | Genolution                                                                                |
| EYA1        | 5'-CAGGAAUAAUUCACUCACAA-3'      | CDS                     | Genolution                                                                                |
| EYA3 (#1)   | 5'-GGAUUAUCCCACCUAUACUUU-3'     | CDS                     | Genolution                                                                                |
| EYA3 (#2)   | 5'-GCUCGAUUGGUUCUACUGU-3'       | 3' UTR                  | Genolution                                                                                |
| RNAPII (#1) | 5'-CGUACAAUGCAGACUUUGAUU-3'     | CDS                     | Genolution                                                                                |
| RNAPII (#2) | 5'-GAAGUUUAAAUAAGUUUAUU-3'      | 3' UTR                  | Genolution                                                                                |

**Supplementary Table 3. List of plasmids used in this study.**

| <b>Plasmid</b>              | <b>Supplier</b>          | <b>Catalog No.</b> |
|-----------------------------|--------------------------|--------------------|
| pcDNA-DEST-FLAG_H2AX_WT     | in this study            | N/A                |
| pcDNA-DEST-FLAG_H2AX_YF     | in this study            | N/A                |
| pcDNA-DEST-FLAG_H2AX_YE     | in this study            | N/A                |
| pcDNA-DEST47_H2AX_WT        | in this study            | N/A                |
| pcDNA-DEST47_H2AX_YF        | in this study            | N/A                |
| pcDNA-DEST47_H2AX_YE        | in this study            | N/A                |
| pcDNA-DEST47_H2AX_SA        | in this study            | N/A                |
| pcDNA-DEST47_H2AX_SE        | in this study            | N/A                |
| pcDNA-DEST53_WSTF_WT        | in this study            | N/A                |
| pcDNA-DEST53_WSTF_WT_siR    | in this study            | N/A                |
| pcDNA-DEST53_WSTF_KD        | in this study            | N/A                |
| pcDNA-DEST53_WSTF_KD_siR    | in this study            | N/A                |
| pcDNA-DEST53_EYA1           | in this study            | N/A                |
| pcDNA-DEST53_EYA3           | in this study            | N/A                |
| pcDNA-DEST53 (EV)           | Thermo Fisher Scientific | #12288015          |
| pcDNA-DEST47 (EV)           | Thermo Fisher Scientific | #12281010          |
| pcDNA-DEST-FLAG (EV)        | in this study            | N/A                |
| I-SceI plasmid              | gift from Jeremy Stark   | N/A                |
| pcDNA-DEST-FLAG_WSTF        | in this study            | N/A                |
| pcDNA-DEST-FLAG_EYA3        | in this study            | N/A                |
| pEGFP-N1_RSF1               | in this study            | N/A                |
| pEGFP-C1_SNF2h              | in this study            | N/A                |
| pcDNA-DEST53_RNF2           | in this study            | N/A                |
| FLAG-RNA Polymerase II_WT   | Addgene                  | #35175             |
| FLAG-RNA Polymerase II_ΔCTD | Addgene                  | #35176             |



**Supplementary Table 4. List of mutagenesis primer sets used in this study.**

| <b>Plasmid<br/>(pCR8/GW-TOPO)</b> | <b>Forward primers for mutagenesis</b>                              | <b>Reverse primers for mutagenesis</b>                              | <b>Supplier<br/>(<a href="http://www.macrogen.com">http://www.macrogen.com</a>)</b> |
|-----------------------------------|---------------------------------------------------------------------|---------------------------------------------------------------------|-------------------------------------------------------------------------------------|
| WSTF-KD<br>(C338A)                | 5'-<br>CCACTAAATCCTAAGTTATGG <u>GCT</u> CACGTACA<br>CTTGAAGAAGTC-3' | 5'-<br>GACTTCTTCAAGTGTACGTG <u>AGC</u> CCATAACTTA<br>GGATTTAGTGG-3' | MACROGEN                                                                            |
| WSTF_WT_<br>siRNA-resistant       | 5'-GAACA <u>AGAGGT</u> <u>AG</u> GCTGAGCTTTTGAA-3'                  | 5'-TTCAAAAGCTCAGC <u>TACCTCT</u> ITGTTC-3'                          | MACROGEN                                                                            |
| WSTF_KD_<br>siRNA-resistant       | 5'-GAACA <u>AGAGGT</u> <u>AG</u> GCTGAGCTTTTGAA-3'                  | 5'-TTCAAAAGCTCAGC <u>TACCTCT</u> ITGTTC-3'                          | MACROGEN                                                                            |
| <i>H2AX_WT<br/>sequence</i>       | 5'-AAGGCCACCCAGGCC <u>TCCC</u> AGGAG <u>TAC</u> -3'                 | 5'- <u>GTACTCCTGGGA</u> GGCCTGGGTGGCCTT-3'                          | <i>Reference sequences<br/>(S139/Y142)</i>                                          |
| H2AX_S139A                        | 5'-AAGGCCACCCAGGCC <u>GCC</u> CAGGAGTAC-3'                          | 5'-GTACTCCTG <u>GGC</u> GGCCTGGGTGGCCTT-3'                          | MACROGEN                                                                            |
| H2AX_S139E                        | 5'-AAGGCCACCCAGGCC <u>GAA</u> CAGGAGTAC-3'                          | 5'-GTACTCCTG <u>TTC</u> GGCCTGGGTGGCCTT-3'                          | MACROGEN                                                                            |
| H2AX_Y142F                        | 5'-AAGGCCACCCAGGCCTCCAGGAG <u>TTC</u> -3'                           | 5'- <u>GAA</u> CTCCTGGGAGGCCTGGGTGGCCTT-3'                          | MACROGEN                                                                            |
| H2AX_Y142E                        | 5'-AAGGCCACCCAGGCCTCCAGGAG <u>GAA</u> -3'                           | 5'- <u>TTC</u> CTCCTGGGAGGCCTGGGTGGCCTT-3'                          | MACROGEN                                                                            |
